# Supplementary material
Source: Research Square preprint supplement (doi:10.21203/rs.3.rs-9044799/v1)
Supplement: Supplementary file 1 [file 282c1c0ff365c42b547a965b.pdf]

# An LLM-Empowered Hierarchical Cognitive Architecture for Interpretable and Scalable Multi-Agent Reinforcement Learning

This document provides additional methodological details that support the main manuscript. All experiments use the publicly available StarCraft Multi-Agent Challenge (SMAC) benchmark and the implementation is based on the PyMARL framework with LEHCA extensions.

## 1. Supplementary Methods

**Environment:** StarCraft II via the SMAC benchmark. Each scenario defines a map (e.g., `3m`, `5m\_vs\_6m`, `6h\_vs\_8z`) with a fixed number of allied and enemy units.

**Observations:** Per-agent local observation (e.g., unit features, ally/enemy visibility); optional global state for the mixer.

**Actions:** Discrete: no-op, move (4 directions), attack (4 directions + attack target for each enemy). Total action dimension is environment-dependent (e.g.,  $6 + n_{\text{enemies}}$  for attack actions).

**Rewards:** Sparse win/loss and optional death/kill rewards; reward scaling and shaping are as specified in the SMAC and SC2 env config (e.g., `reward\_scale`, `reward\_scale\_rate`, `reward\_win`, `reward\_death\_value`).

## 2. MARL Module (QMIX)

**Agent network:** `n\_rnn` (recurrent agent). Input: observation (and optionally last action, agent id if enabled). Architecture:  $\text{Linear}(\text{obs\_dim}, \text{rnn\_hidden\_dim}) \rightarrow \text{ReLU} \rightarrow \text{GRUCell}(\text{rnn\_hidden\_dim}, \text{rnn\_hidden\_dim}) \rightarrow \text{Linear}(\text{rnn\_hidden\_dim}, n_{\text{actions}})$ . Output: Q-values per action.

**Mixer:** QMIX mixer with `mixing\_embed\_dim` and hypernet embedding dimension `hypernet\_embed`.

**Training:** Standard QMIX loss (TD target, mixing); replay buffer of episodes; target network updated every `target\_update\_interval` steps.

## 3. Training Protocol and Hyperparameters

**Env config:** Map is set per run (e.g., `3m`, `5m\_vs\_6m`, `6h\_vs\_8z`).

mixing\_embed\_dim | 32 | Mixer embedding dimension |  
hypernet\_embed | 64 | Hypernet embedding dimension |  
action\_selector | epsilon\_greedy | Epsilon-greedy action selection |  
epsilon\_start | 1.0 | Initial exploration rate |  
epsilon\_finish | 0.05 | Final exploration rate |  
epsilon\_anneal\_time | 300000 | Steps for epsilon annealing |  
rnn\_hidden\_dim | 64 | RNN hidden size (from default config) |
